# Supplementary material for: Zeolitic-imidazolate framework (ZIF-8)-based immobilized multi-enzymes integrated with a colorimetric sensor for cholesterol assay
Source: Royal Society of Chemistry journal article supplement (doi:10.1039/d2nj05747f), 2023-01-01
Supplement: d2nj05747f1.pdf [file d2nj05747f1.pdf]

**Zeolitic-Imidazolate Framework (ZIF-8)-Based Immobilized Multi-Enzyme Integrated with  
Colorimetric Sensor for Cholesterol Assay**

Ke Yang <sup>a</sup>, Guoning Chen <sup>c</sup>, Lu Wang <sup>a</sup>, Miao Guo <sup>a</sup>, Jiameng Xu <sup>a</sup>, Yirong Ma <sup>a</sup>, Zhimin Luo <sup>a</sup>,  
Aiguo Zeng <sup>a,\*</sup>, Qiang Fu <sup>a,b,\*</sup>

<sup>a</sup> Department of Pharmaceutical Analysis, School of Pharmacy, Xi'an Jiaotong University, Xi'an 710061, China

<sup>b</sup> Department of Pharmaceutical Analysis, College of Pharmacy, Shenzhen Technology University, Shenzhen 518118, China

<sup>c</sup> Department of Pharmaceutical Analysis, School of Pharmacy, Key Laboratory of Ningxia Ethnomedicine Modernization, Ministry of Education, Ningxia Medical University, Yinchuan 750004, China

\* Corresponding author at: Department of Pharmaceutical Analysis, School of Pharmacy, Xi'an Jiaotong University, Xi'an 710061, China; Department of Pharmaceutical Analysis, College of Pharmacy, Shenzhen Technology University, Shenzhen 518118, China

E-mail addresses: [agzeng@mail.xjtu.edu.cn](mailto:agzeng@mail.xjtu.edu.cn) (A.G. Zeng) ; [fuqiang@mail.xjtu.edu.cn](mailto:fuqiang@mail.xjtu.edu.cn) (Q. Fu).

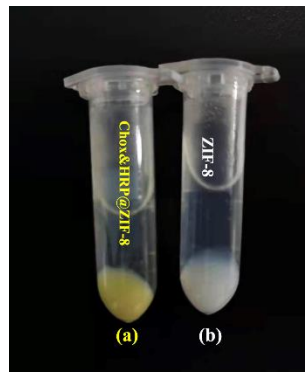

Figure. S1 The prepared Chox&HRP@ZIF-8(a) and ZIF-8 (b).

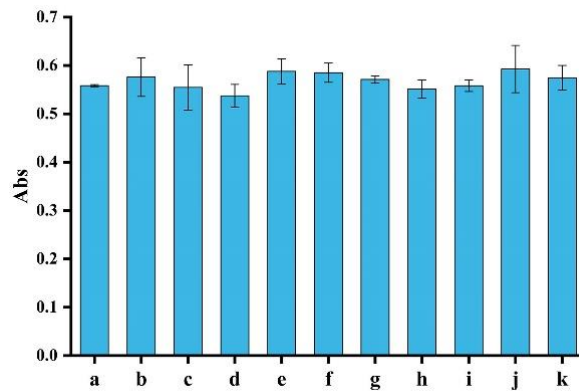

Figure. S2 Interference of different interferents on the determination of cholesterol. (n=3)

a: No interference, b: Estradiol, c: Bisphenol A, d: Diethylstilbestrol, e: Oestrone, f: Glucose, g: Arginine, h: Glycine, i: Ascorbic acid, j:  $\text{Na}^+$ , k:  $\text{K}^+$

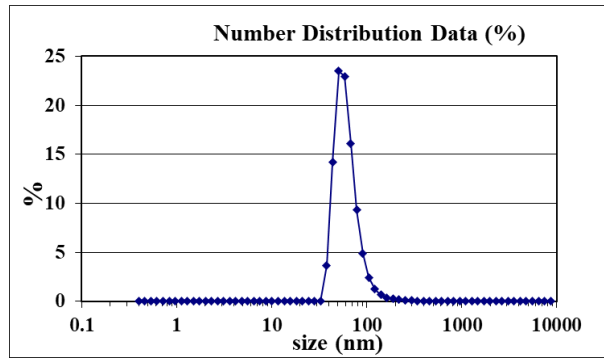

Figure.S3 Dynamic light scattering spectrum of ZIF-8 nanocomposite.

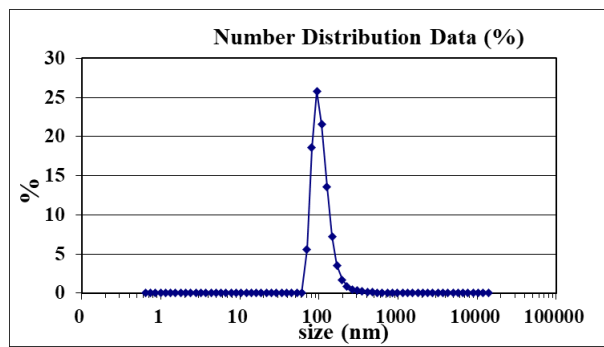

Figure.S4 Dynamic light scattering spectrum of Chox&HRP@ZIF-8 nanocomposite.

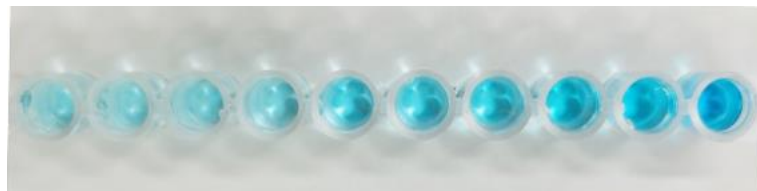

Figure.S5 The color of different concentration of cholesterol after reaction finished.

Table.S1 Comparison with other methods.

| Methods                                | Samples | Linear range ( $\mu\text{M}$ ) | LOD ( $\mu\text{M}$ ) | Ref.      |
|----------------------------------------|---------|--------------------------------|-----------------------|-----------|
| Enzymes co-immobilization colorimetric | Serum   | 3.125~200                      | 0.9                   | This Work |
| Fiber biosensor                        | Serum   | 517~6465                       | 108                   | 42        |
|                                        | Serum   | 646~6465                       | 137                   | 43        |
| Chemiluminescence                      | Serum   | 50~10000                       | 1.5                   | 44        |
|                                        | Serum   | 0.08~300                       | 0.04                  | 45        |
| Electrochemical                        | Serum   | 50~6000                        | 8.4                   | 46        |
|                                        | Serum   | 25~3000                        | 0.02                  | 47        |
| Colorimetric                           | Serum   | 10~100                         | 3.5                   | 48        |
|                                        | Serum   | 20~600                         | 6                     | 49        |
| Electrochemiluminescence               | Serum   | 0.003~1.5                      | 0.001                 | 50        |
|                                        | Serum   | 0.15~828                       | 0.05                  | 51        |
